# Supplementary material for: Novel truxene-based dipyrromethanes (DPMs): synthesis, spectroscopic characterization and photophysical properties
Source: publisher site journal article supplement (doi:10.3762/bjoc.20.186), 2024-08-29

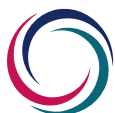

## Supporting Information

for

### **Novel truxene-based dipyrromethanes (DPMs): synthesis, spectroscopic characterization and photophysical properties**

Shakeel Alvi and Rashid Ali

*Beilstein J. Org. Chem.* **2024**, *20*, 2163–2170. [doi:10.3762/bjoc.20.186](https://doi.org/10.3762/bjoc.20.186)

### **$^1\text{H}$ NMR, $^{13}\text{C}$ NMR and HRMS spectra of all the synthesized compounds**

## Table of contents

|                                                                           |    |
|---------------------------------------------------------------------------|----|
| <sup>1</sup> H NMR and <sup>13</sup> C NMR spectrum of compound <b>12</b> | S2 |
| HRMS spectrum of compound <b>12</b>                                       | S3 |
| <sup>1</sup> H NMR spectrum of compound <b>14</b>                         | S3 |
| <sup>13</sup> C NMR and HRMS spectrum of compound <b>14</b>               | S4 |
| <sup>1</sup> H NMR and <sup>13</sup> C NMR spectrum of compound <b>15</b> | S5 |
| HRMS spectrum of compound <b>15</b>                                       | S6 |
| <sup>1</sup> H NMR spectrum of compound <b>16</b>                         | S6 |
| <sup>13</sup> C NMR and HRMS spectrum of compound <b>16</b>               | S7 |
| <sup>1</sup> H NMR spectrum of compound <b>17</b>                         | S8 |
| <sup>1</sup> H NMR spectrum of compound <b>18</b>                         | S8 |
| <sup>13</sup> C NMR and HRMS spectrum of compound <b>18</b>               | S9 |

# <sup>1</sup>H NMR spectrum of compound 12

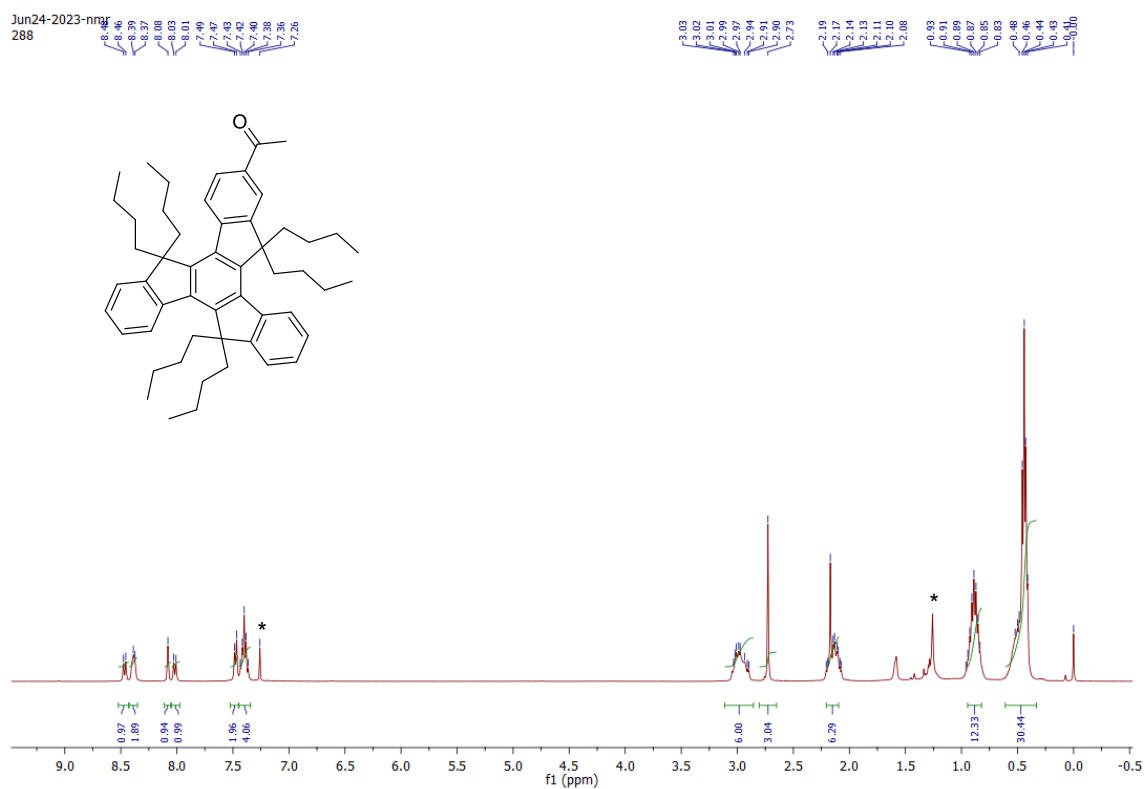

# <sup>13</sup>C NMR spectrum of compound 12

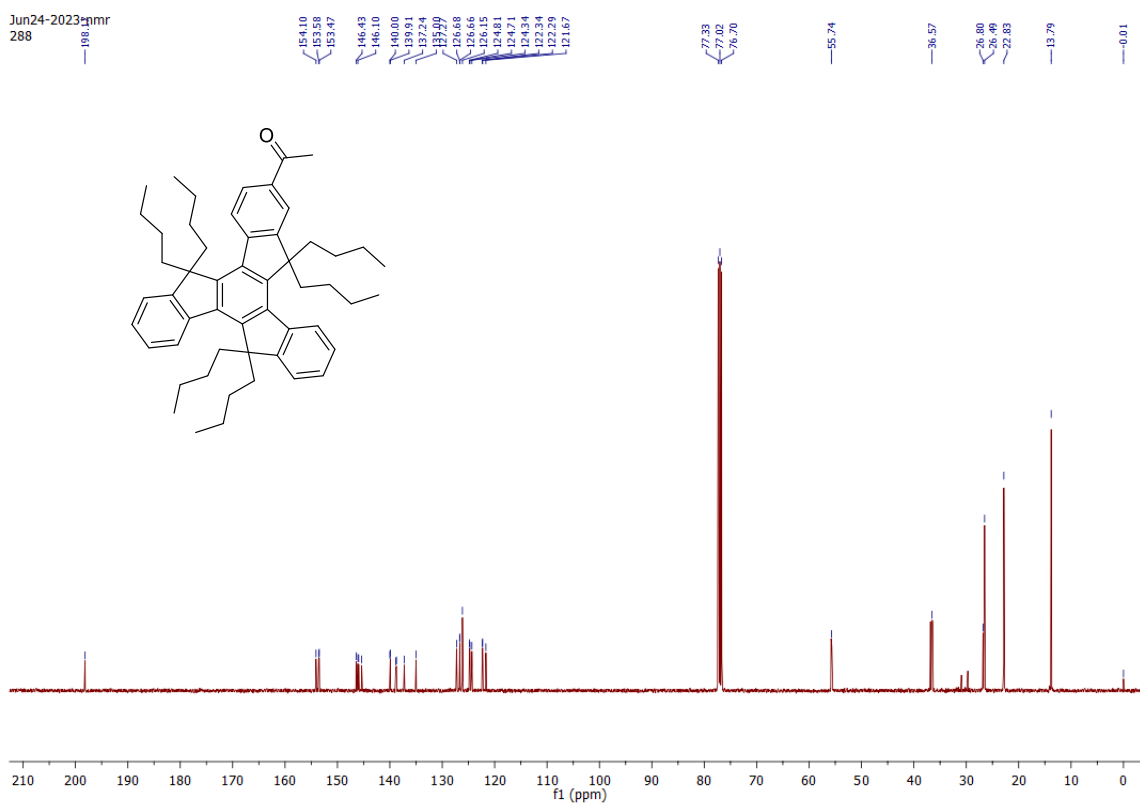

### HRMS spectrum of compound 12

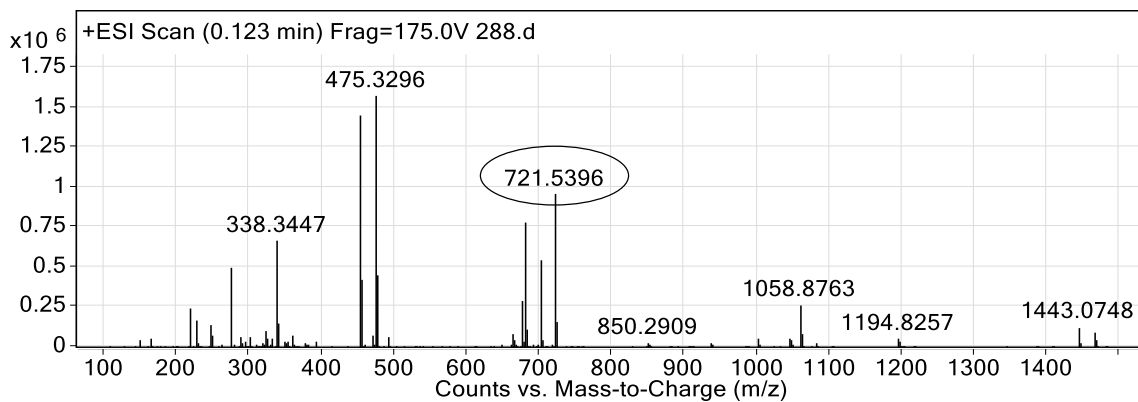

### <sup>1</sup>H NMR spectrum of compound 14

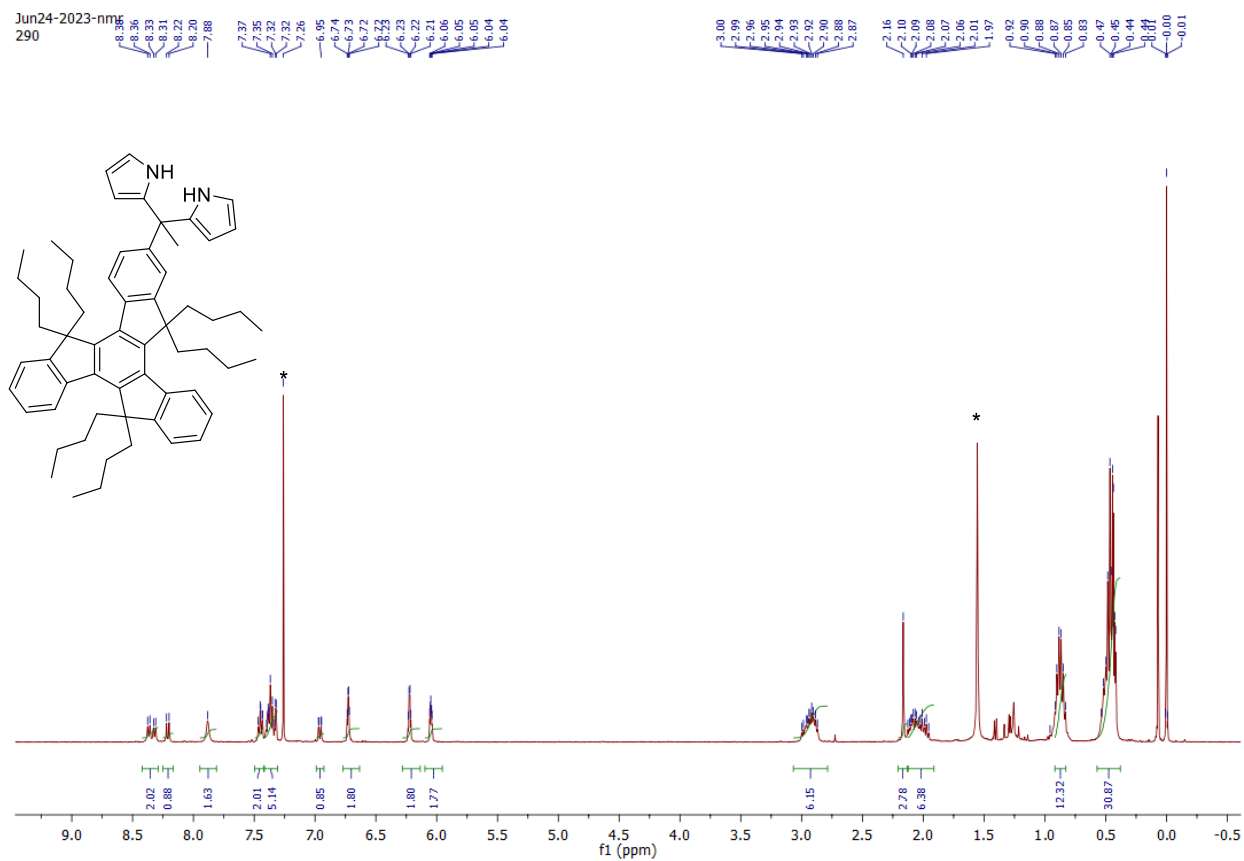

### <sup>13</sup>C NMR spectrum of compound **14**

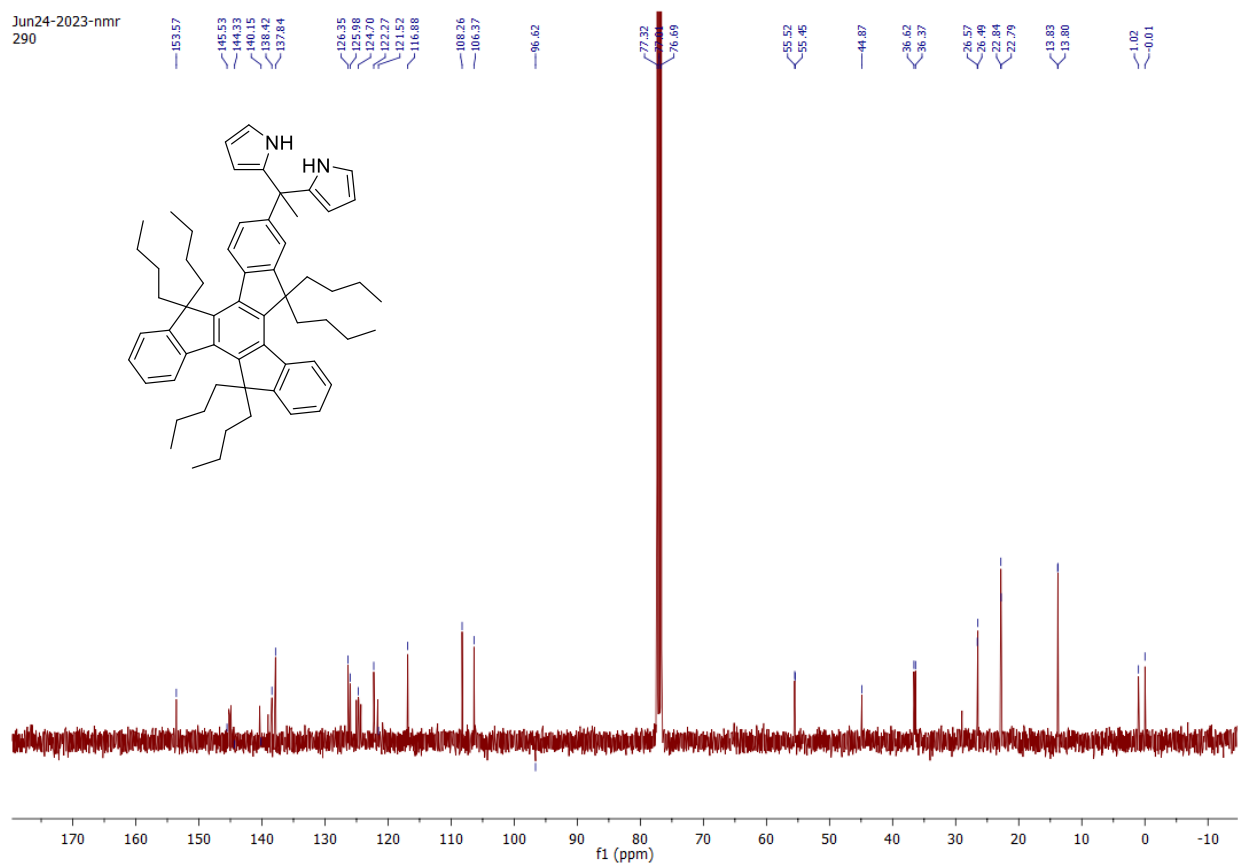

### HRMS spectrum of compound **14**

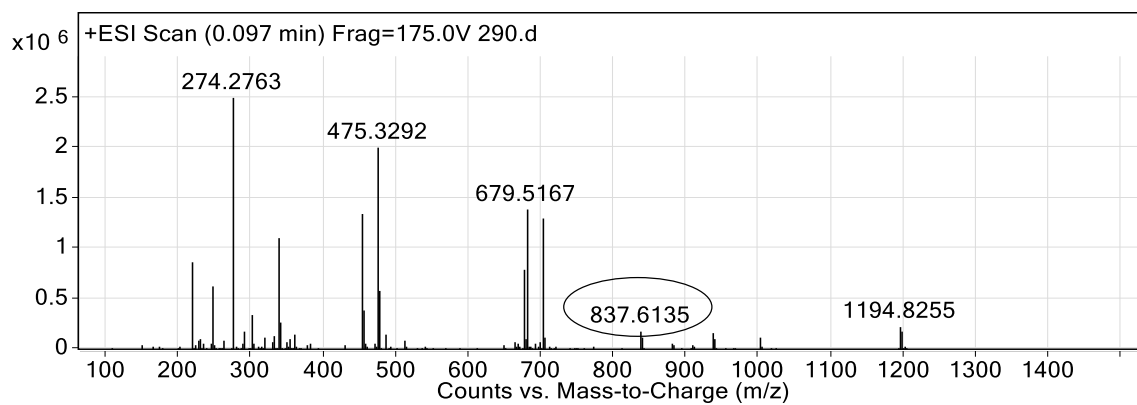

# <sup>1</sup>H NMR spectrum of compound **15**

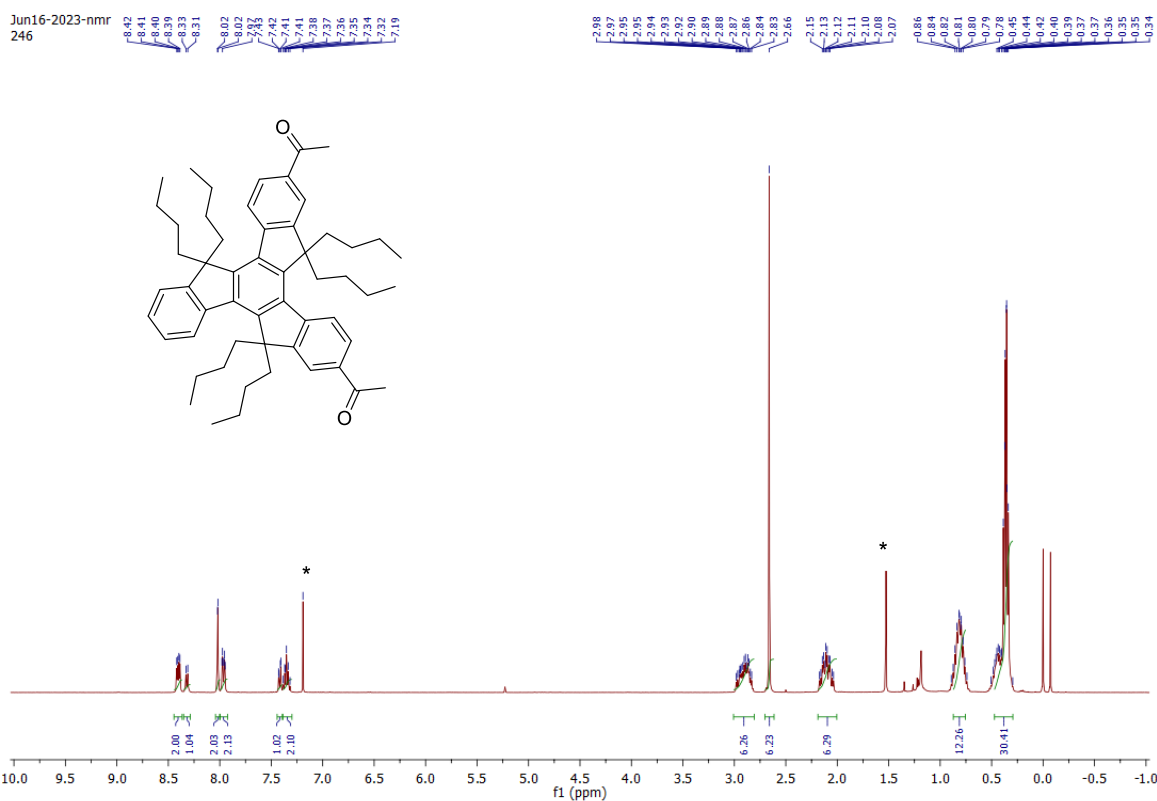

# <sup>13</sup>C NMR spectrum of compound **15**

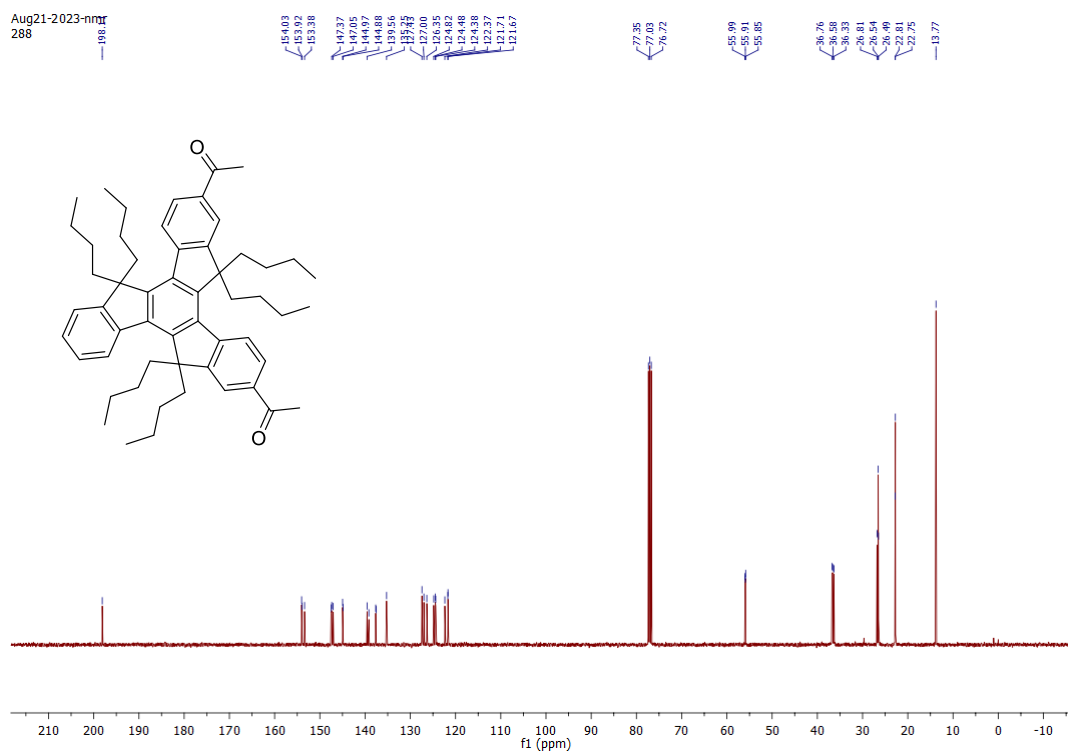

### HRMS spectrum of compound 15

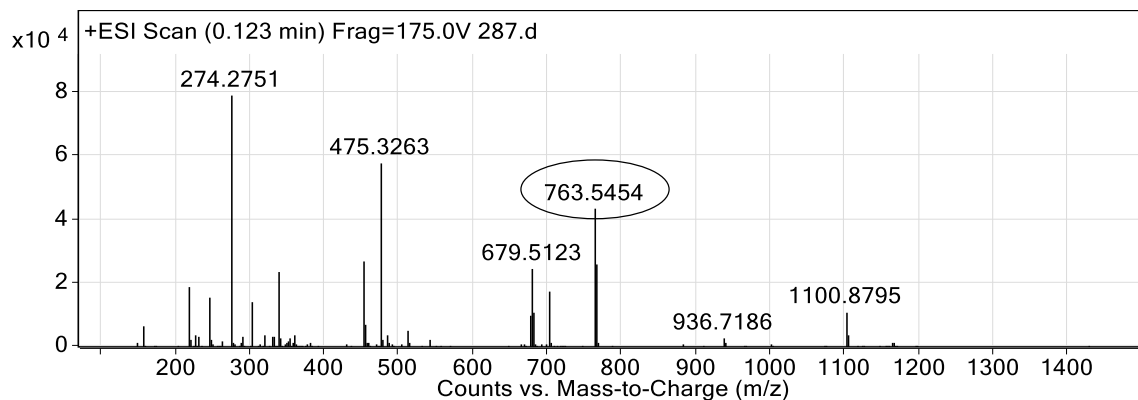

### <sup>1</sup>H NMR spectrum of compound 16

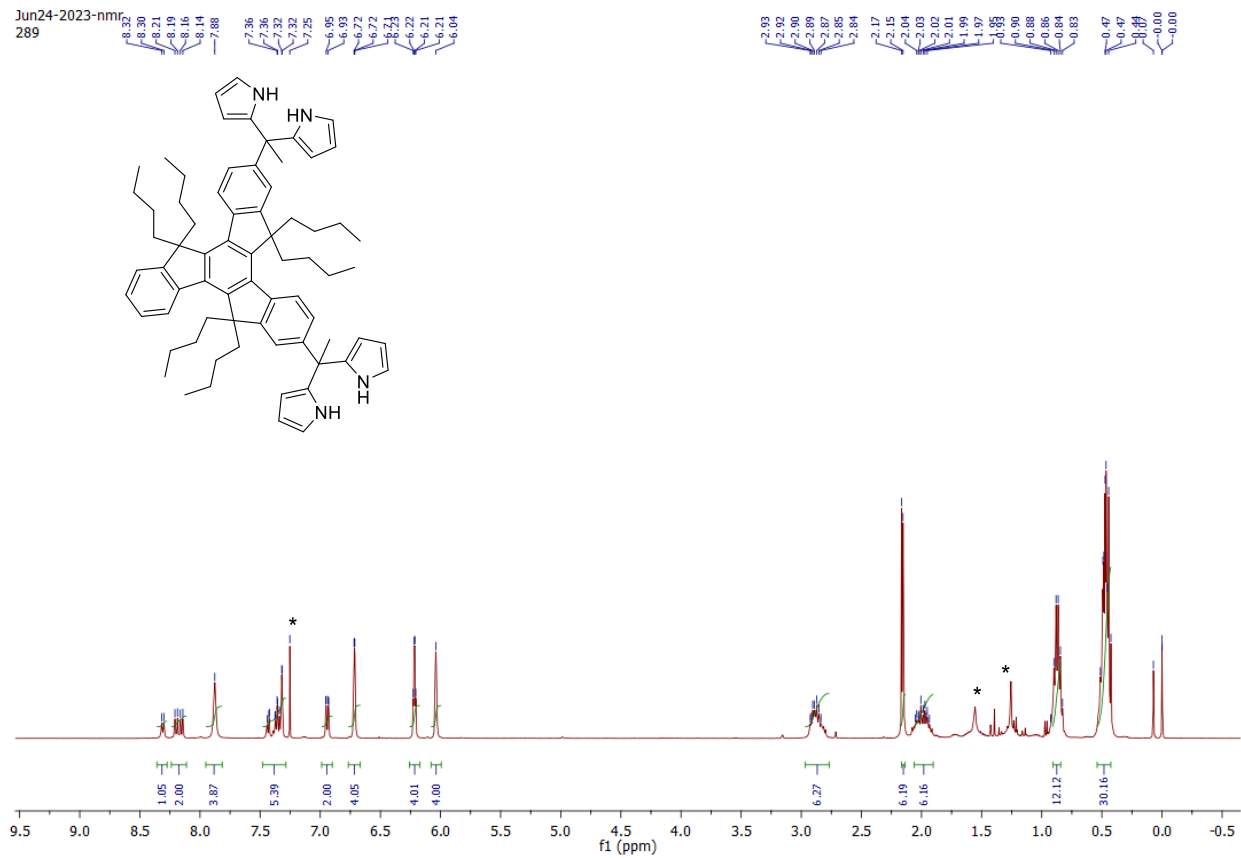

### $^{13}\text{C}$ NMR spectrum of compound **16**

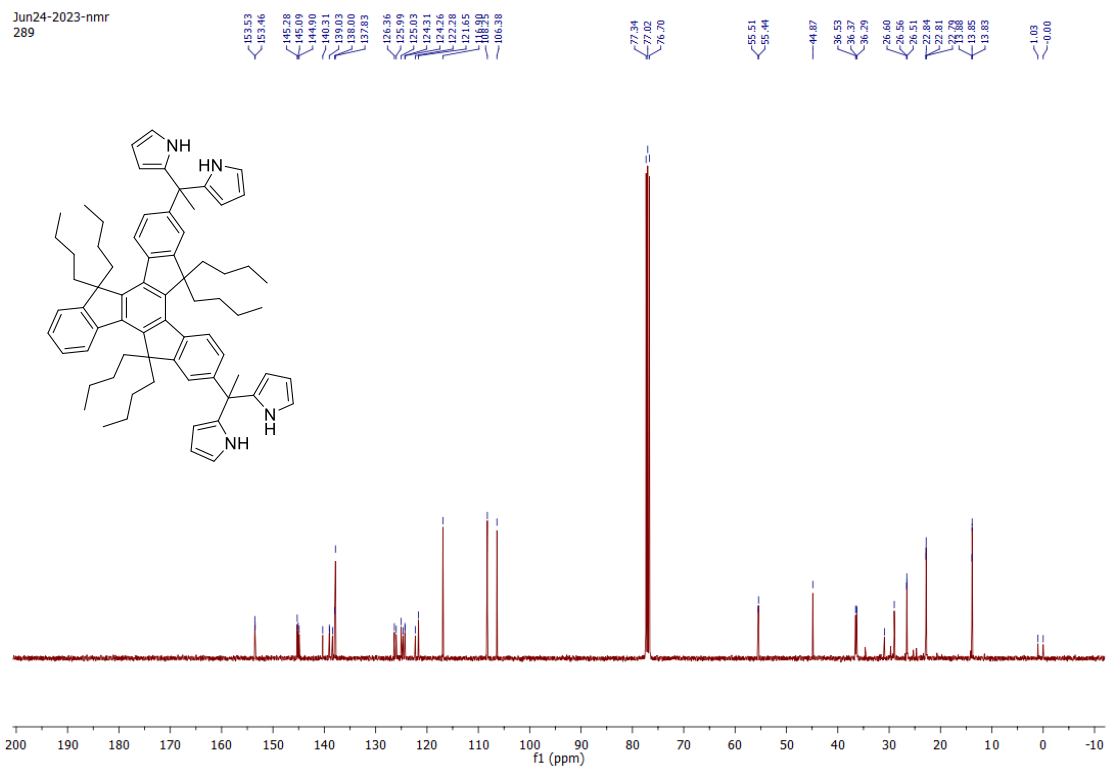

### HRMS spectrum of compound **16**

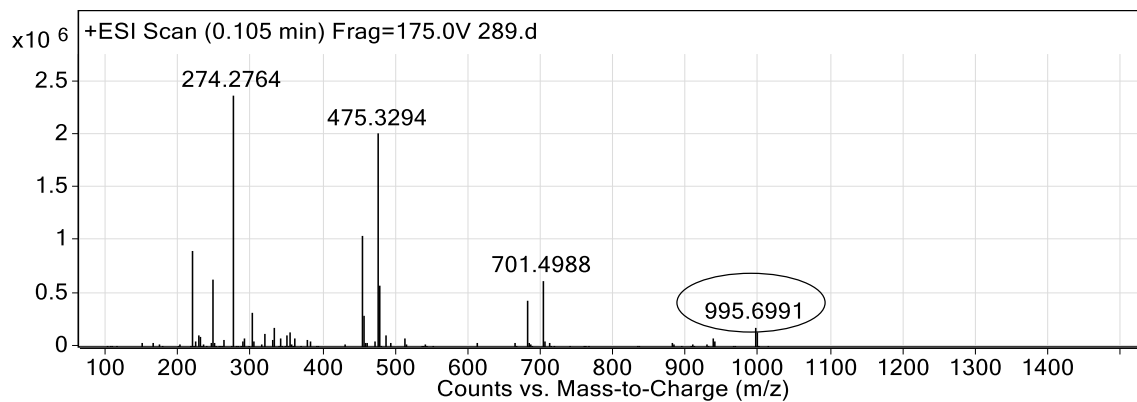



# <sup>1</sup>H NMR spectrum of compound 17

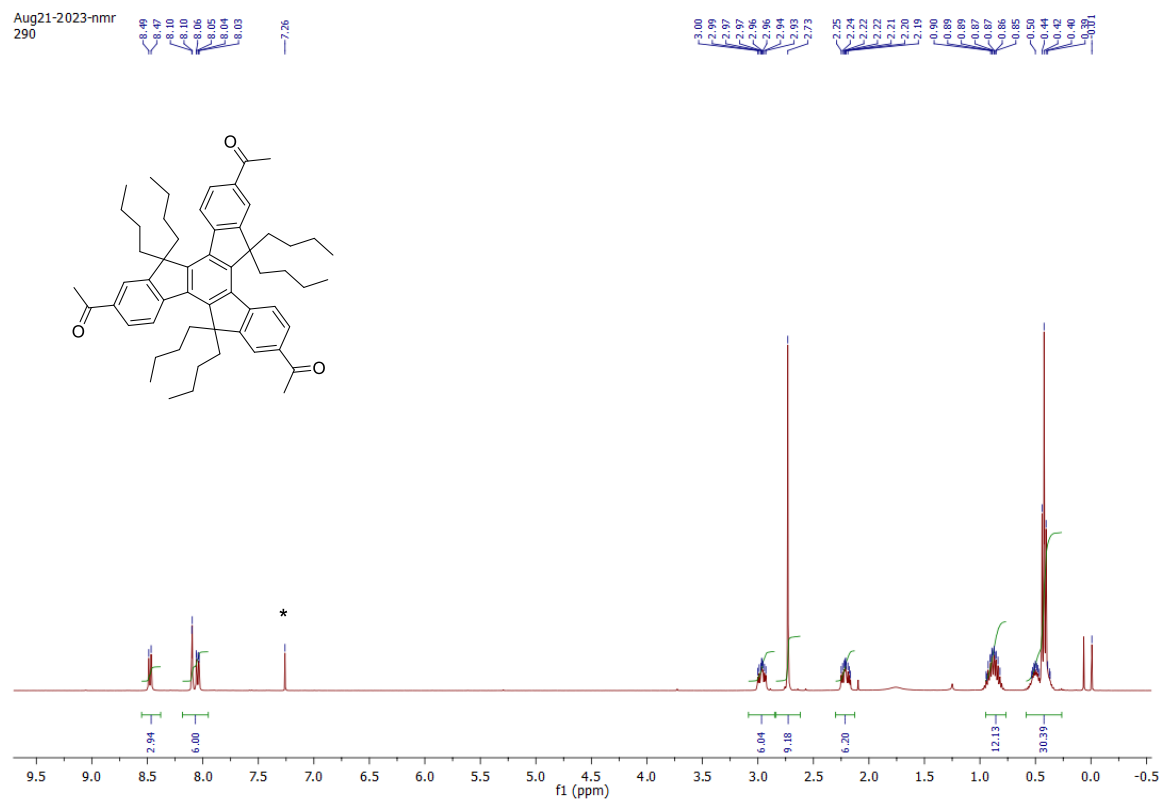

# <sup>1</sup>H NMR spectrum of compound 18

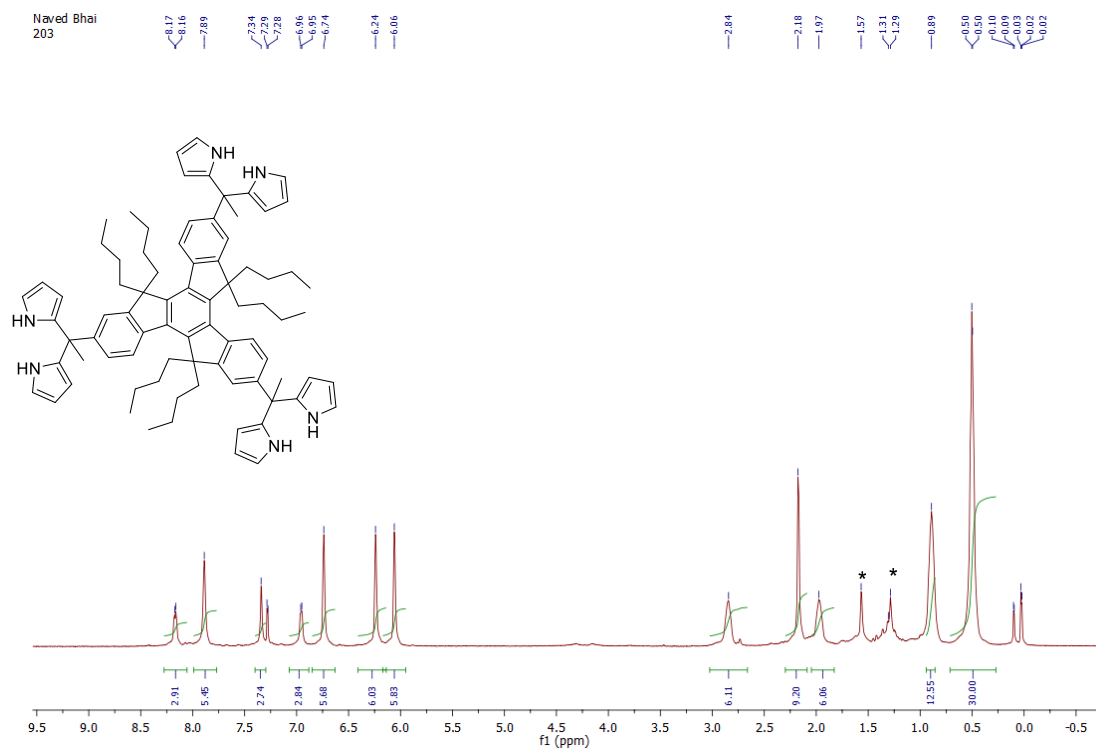

# <sup>13</sup>C NMR spectrum of compound **18**

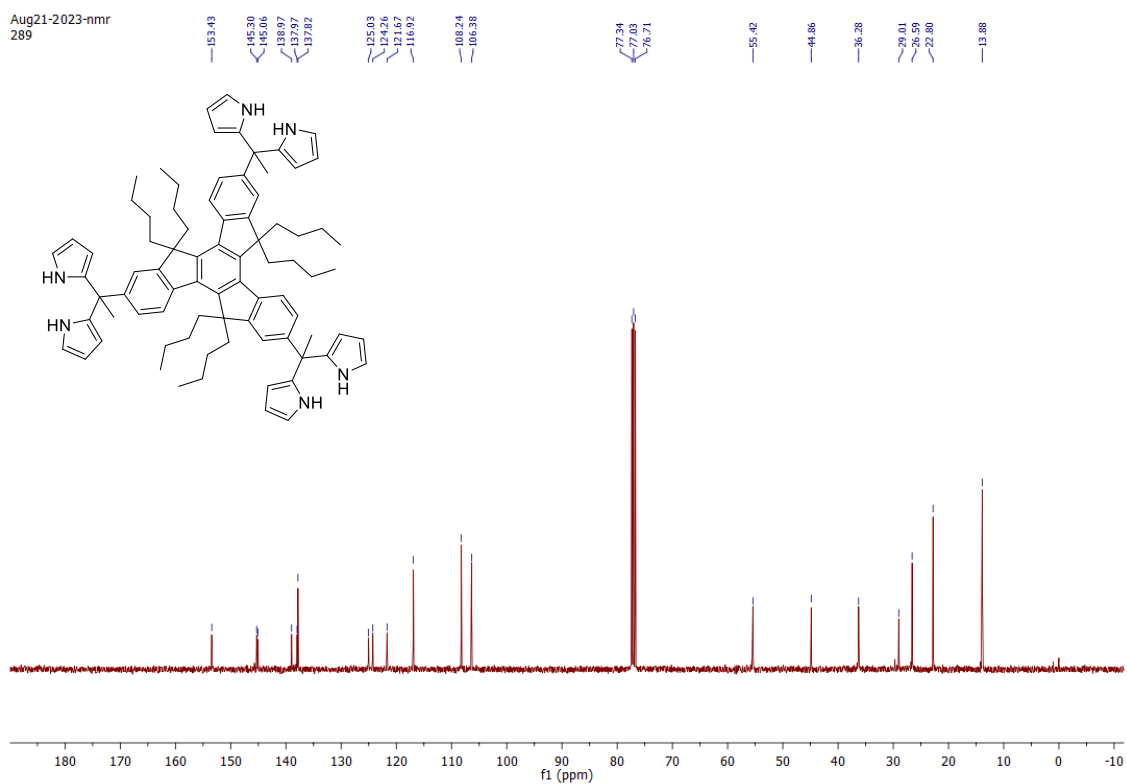

# HRMS spectrum of compound **18**

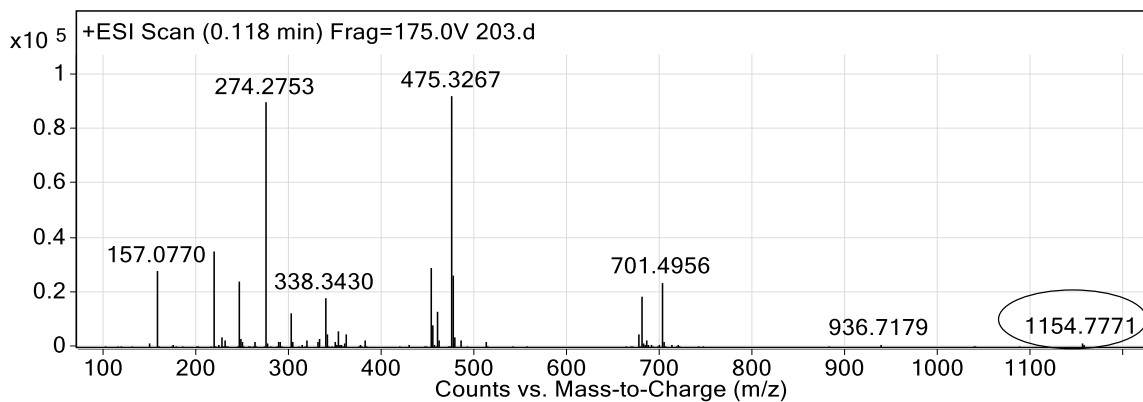

Supplement: Additional file 1 [file 1860-5397-20-186-S1.pdf]
